# Supplementary material
Source: Springer Nature journal article supplement (https://www.springermedizin.de/resource/supplementary/12985_2014_2441_MOESM2_ESM.pdf/9606726)

10<sup>6</sup> pfu    
  10<sup>4</sup> pfu    
  10<sup>2</sup> pfu    
  10<sup>0</sup> pfu    
 uninfected

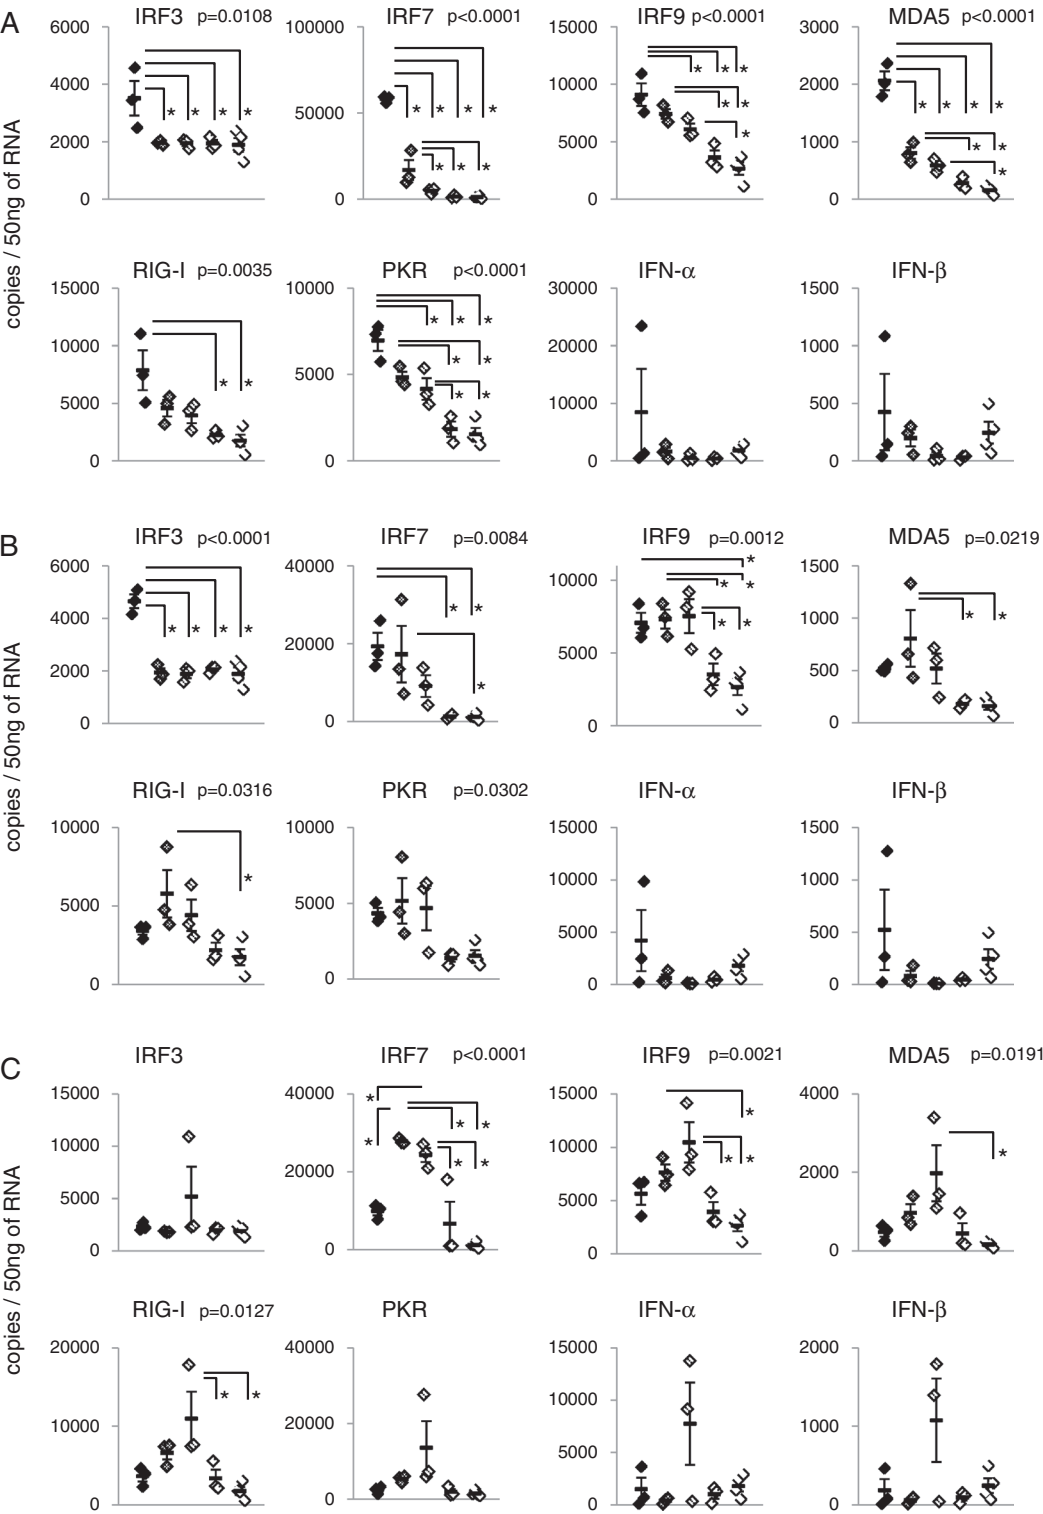

Supplement: MOESM2 [file 9606726]
